# Supplementary material for: Can DNA barcoding accurately discriminate megadiverse Neotropical freshwater fish fauna?
Source: PubMed Central journal article supplement (PMC3608943; doi:10.1186/1471-2156-14-20), 2013-03-09

**Additional file 2 - NJ dendrogram of the 1,244 specimens (254 species) analyzed.**

Node values = bootstrap test (1,000 pseudo-replicas).

Distance Model: Kimura-2-Paramater

Codon Positions: 1st, 2nd, 3rd

Sequence count: 1244

Species count: 254

Genus count: 127

Family count: 36

2 %

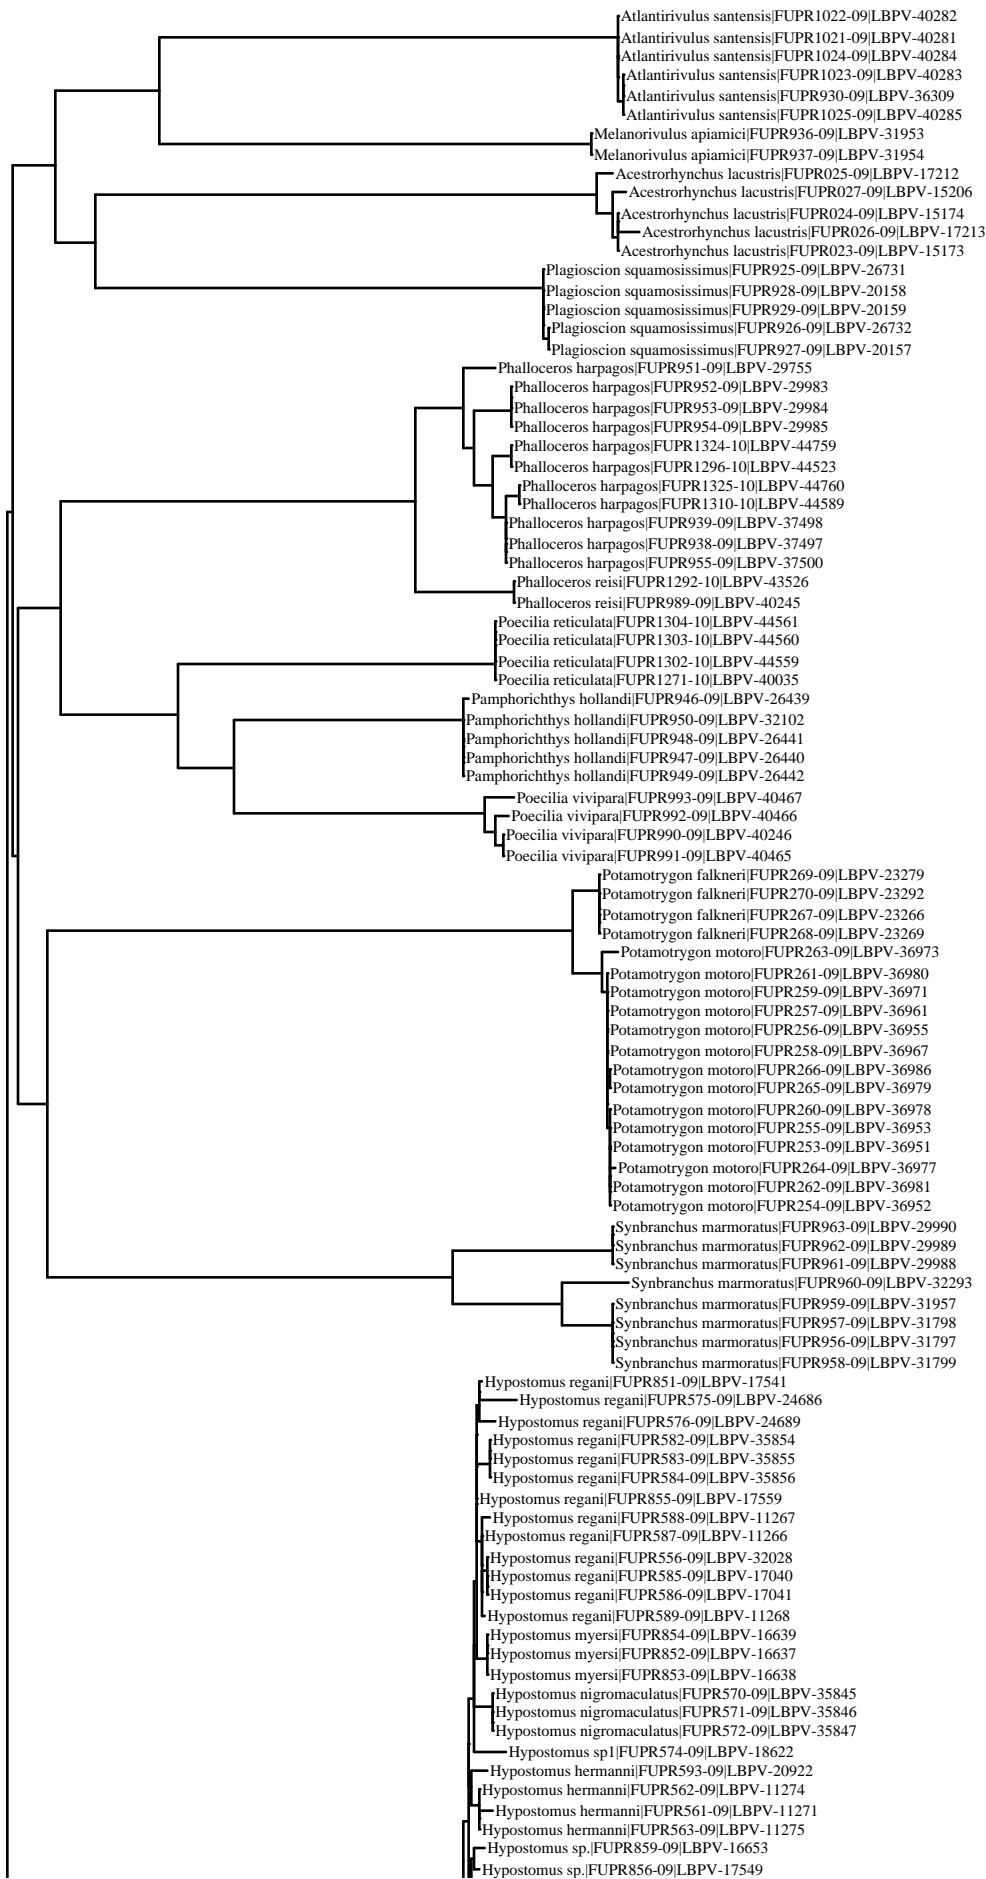

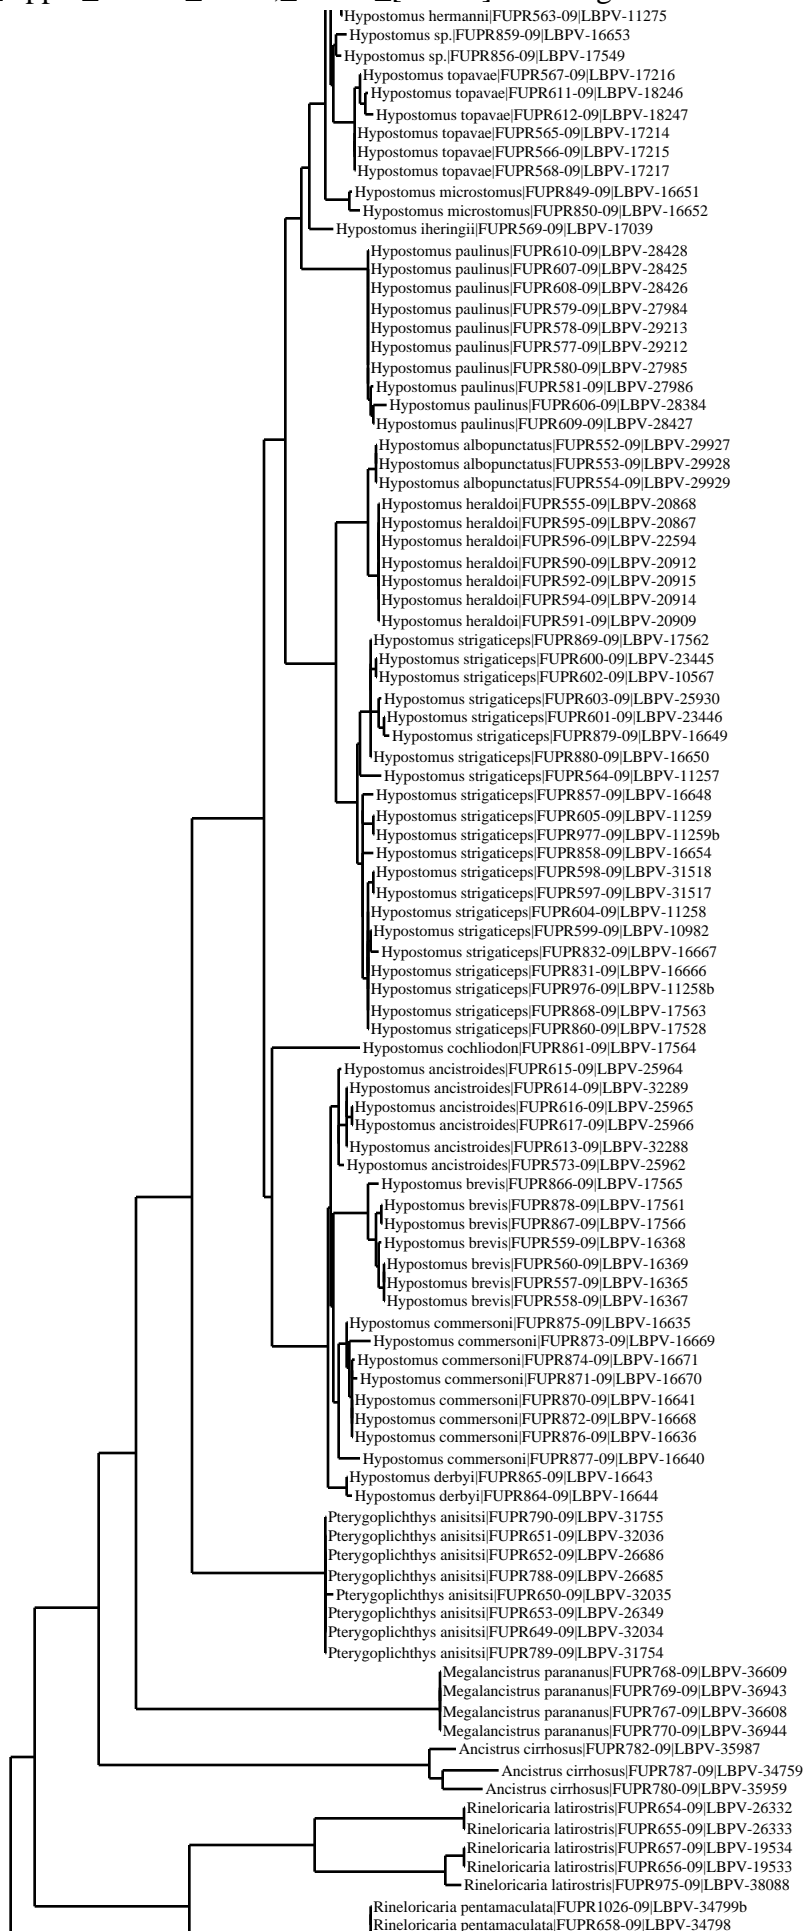

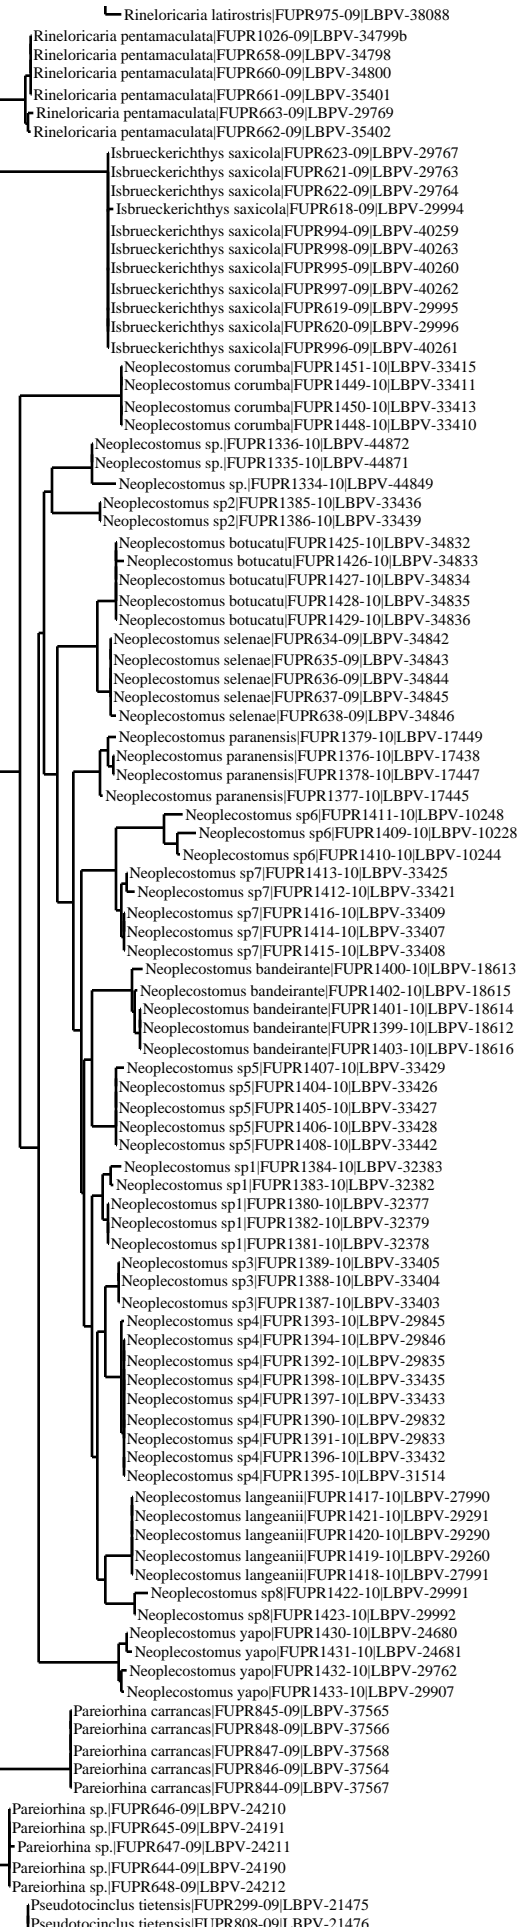

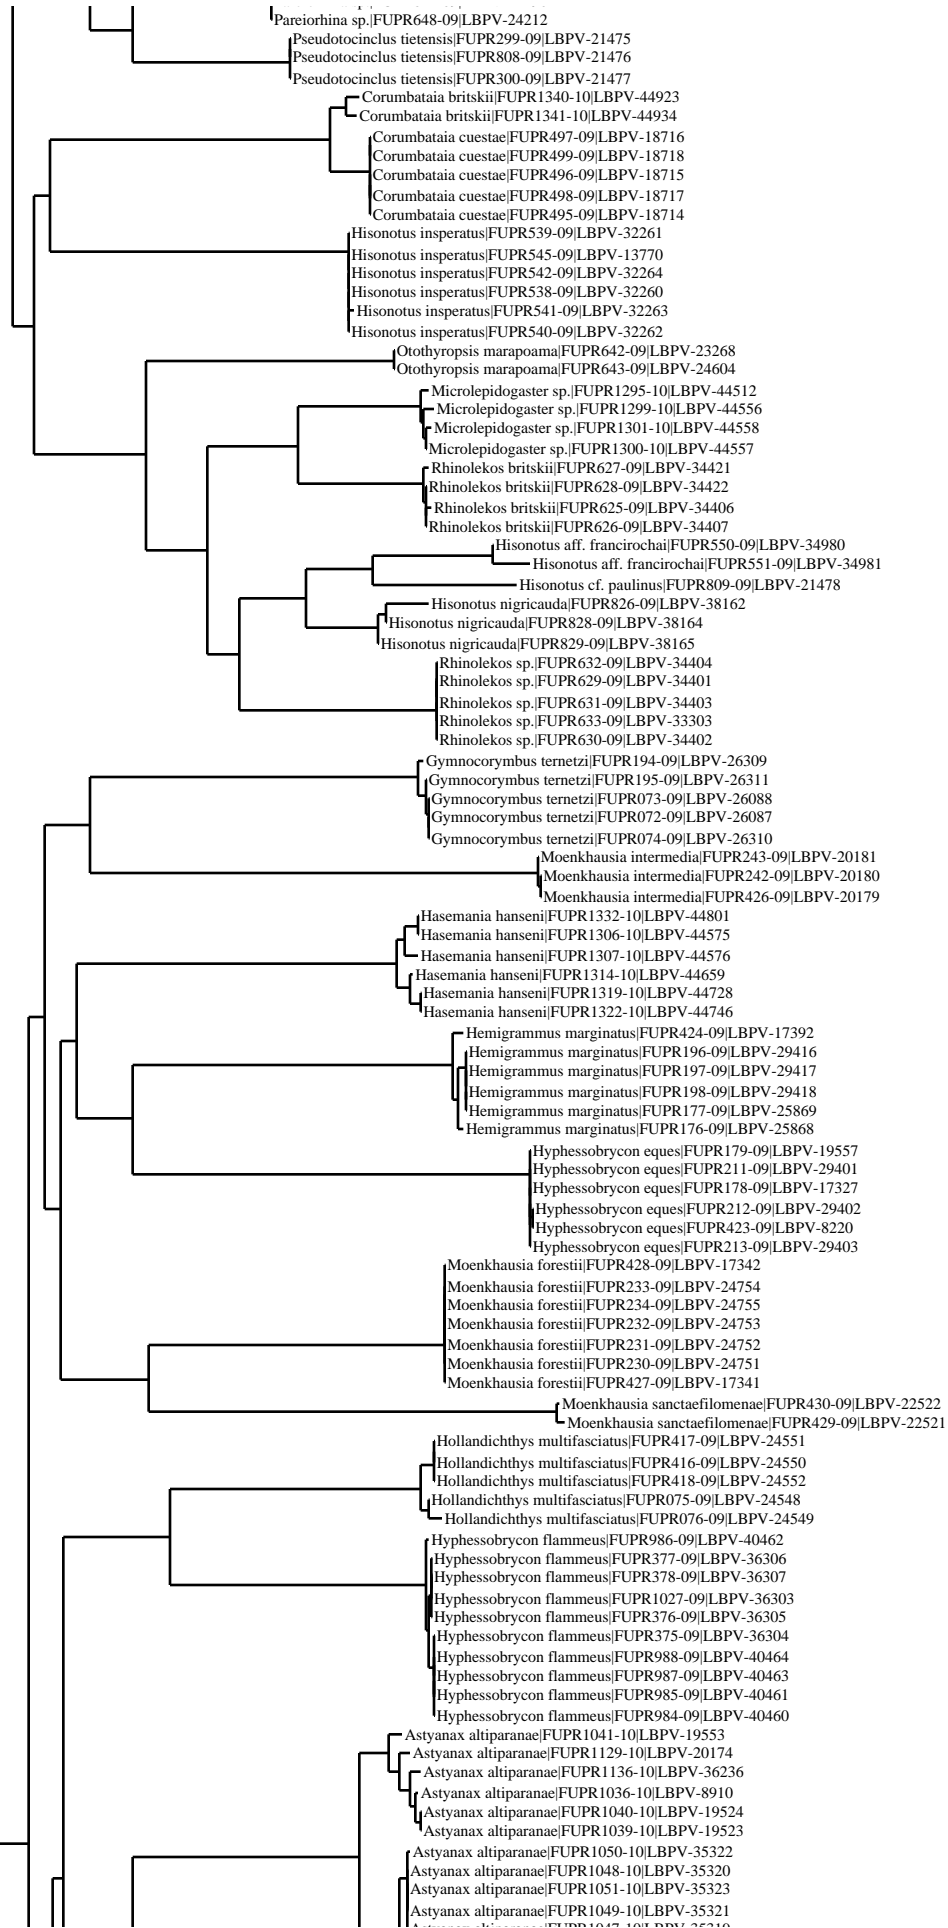

*Astyanax altiparanae*|FUPR1051-10|LBPV-35323  
*Astyanax altiparanae*|FUPR1049-10|LBPV-35321  
*Astyanax altiparanae*|FUPR1047-10|LBPV-35319  
*Astyanax altiparanae*|FUPR1135-10|LBPV-34717  
*Astyanax altiparanae*|FUPR1131-10|LBPV-24768  
*Astyanax altiparanae*|FUPR1134-10|LBPV-29961  
*Astyanax altiparanae*|FUPR1130-10|LBPV-20175  
*Astyanax altiparanae*|FUPR1037-10|LBPV-17317  
*Astyanax altiparanae*|FUPR1133-10|LBPV-29960  
*Astyanax altiparanae*|FUPR1043-10|LBPV-26384  
*Astyanax altiparanae*|FUPR1038-10|LBPV-17318  
*Astyanax altiparanae*|FUPR1132-10|LBPV-24769  
*Astyanax altiparanae*|FUPR1042-10|LBPV-19554  
*Astyanax altiparanae*|FUPR1046-10|LBPV-21446  
*Astyanax altiparanae*|FUPR1044-10|LBPV-21444  
*Astyanax altiparanae*|FUPR1045-10|LBPV-21445  
*Hyphessobrycon bifasciatus*|FUPR419-09|LBPV-25895  
*Hyphessobrycon bifasciatus*|FUPR422-09|LBPV-22648  
*Hyphessobrycon bifasciatus*|FUPR420-09|LBPV-22646  
*Hyphessobrycon* sp2|FUPR421-09|LBPV-22647  
*Astyanax schubarti*|FUPR1126-10|LBPV-31725  
*Astyanax schubarti*|FUPR1128-10|LBPV-31728  
*Astyanax schubarti*|FUPR1124-10|LBPV-31723  
*Astyanax schubarti*|FUPR1127-10|LBPV-31726  
*Astyanax schubarti*|FUPR1125-10|LBPV-31724  
*Astyanax trierythropterus*|FUPR1106-10|LBPV-26029  
*Astyanax trierythropterus*|FUPR1179-10|LBPV-26027  
*Astyanax trierythropterus*|FUPR1180-10|LBPV-26028  
*Astyanax biotae*|FUPR1062-10|LIRP-4276b  
*Astyanax biotae*|FUPR1061-10|LIRP-4276a  
*Astyanax biotae*|FUPR1002-09|LBPV-40267  
*Astyanax biotae*|FUPR1000-09|LBPV-40265  
*Astyanax biotae*|FUPR999-09|LBPV-40264  
*Astyanax biotae*|FUPR1003-09|LBPV-40268  
*Astyanax biotae*|FUPR1001-09|LBPV-40266  
*Astyanax fasciatus*|FUPR1070-10|LBPV-22587  
*Astyanax fasciatus*|FUPR1076-10|LBPV-32216  
*Astyanax fasciatus*|FUPR1078-10|LBPV-32218  
*Astyanax fasciatus*|FUPR1075-10|LBPV-32215  
*Astyanax fasciatus*|FUPR1077-10|LBPV-32217  
*Characidae\_incertae\_sedis*|FUPR312-09|LBPV-33198  
*Characidae\_incertae\_sedis*|FUPR313-09|LBPV-33199  
*Characidae\_incertae\_sedis*|FUPR311-09|LBPV-33197  
*Characidae\_incertae\_sedis*|FUPR314-09|LBPV-33200  
*Characidae\_incertae\_sedis*|FUPR978-09|LBPV-34937b  
*Hyphessobrycon balbus*|FUPR1326-10|LBPV-44771  
*Hyphessobrycon balbus*|FUPR1317-10|LBPV-44723  
*Hyphessobrycon balbus*|FUPR1318-10|LBPV-44724  
*Hyphessobrycon balbus*|FUPR1330-10|LBPV-44779  
*Hyphessobrycon balbus*|FUPR1331-10|LBPV-44790  
*Astyanax bockmanni*|FUPR1114-10|LBPV-26330  
*Astyanax bockmanni*|FUPR1187-10|LBPV-33575  
*Astyanax bockmanni*|FUPR1111-10|LBPV-25952  
*Astyanax bockmanni*|FUPR1110-10|LBPV-25951  
*Astyanax bockmanni*|FUPR1112-10|LBPV-25974  
*Astyanax bockmanni*|FUPR1113-10|LBPV-25975  
*Astyanax paranae*|FUPR1092-10|LBPV-29740  
*Astyanax paranae*|FUPR1088-10|LBPV-29736  
*Astyanax paranae*|BAST525-12|LBPV-5978  
*Astyanax paranae*|FUPR1090-10|LBPV-29738  
*Astyanax paranae*|FUPR1089-10|LBPV-29737  
*Astyanax paranae*|FUPR1087-10|LBPV-29735  
*Astyanax paranae*|FUPR1091-10|LBPV-29739  
*Hyphessobrycon* sp1|FUPR408-09|LBPV-34942  
*Hyphessobrycon* sp1|FUPR411-09|LBPV-34945  
*Hyphessobrycon* sp1|FUPR409-09|LBPV-34943  
*Hyphessobrycon* sp1|FUPR413-09|LBPV-34947  
*Hyphessobrycon* sp1|FUPR412-09|LBPV-34946  
*Hyphessobrycon* sp1|FUPR410-09|LBPV-34944  
*Oligosarcus paranensis*|FUPR085-09|LBPV-18786  
*Oligosarcus paranensis*|FUPR084-09|LBPV-18703  
*Oligosarcus paranensis*|FUPR083-09|LBPV-18702  
*Oligosarcus paranensis*|FUPR082-09|LBPV-18701  
*Oligosarcus paranensis*|FUPR086-09|LBPV-22481  
*Oligosarcus paranensis*|FUPR319-09|LBPV-34773  
*Oligosarcus paranensis*|FUPR320-09|LBPV-34774  
*Oligosarcus paranensis*|FUPR321-09|LBPV-34775  
*Oligosarcus pintoii*|FUPR323-09|LBPV-24853  
*Oligosarcus pintoii*|FUPR322-09|LBPV-24852  
*Psellogrammus kennedyi*|FUPR017-09|LBPV-31815  
*Psellogrammus kennedyi*|FUPR015-09|LBPV-27408  
*Psellogrammus kennedyi*|FUPR016-09|LBPV-31814  
*Psellogrammus kennedyi*|FUPR132-09|LBPV-31816  
*Psellogrammus kennedyi*|FUPR014-09|LBPV-26407  
*Bryconamericus stramineus*|FUPR063-09|LBPV-14155  
*Bryconamericus stramineus*|FUPR064-09|LBPV-14156  
*Bryconamericus stramineus*|FUPR1333-10|LBPV-44828  
*Bryconamericus turiuba*|FUPR081-09|LBPV-31886  
*Bryconamericus iheringii*|FUPR066-09|LBPV-18707  
*Bryconamericus iheringii*|FUPR065-09|LBPV-18706  
*Bryconamericus iheringii*|FUPR1238-10|LBPV-29925  
*Bryconamericus iheringii*|FUPR180-09|LBPV-34658  
*Bryconamericus iheringii*|FUPR1237-10|LBPV-29924  
*Bryconamericus iheringii*|FUPR1233-10|LBPV-29778  
*Bryconamericus iheringii*|FUPR1232-10|LBPV-29777  
*Bryconamericus iheringii*|FUPR182-09|LBPV-34762  
*Piabina argentea*|FUPR118-09|LBPV-35933  
*Piabina argentea*|FUPR119-09|LBPV-35934

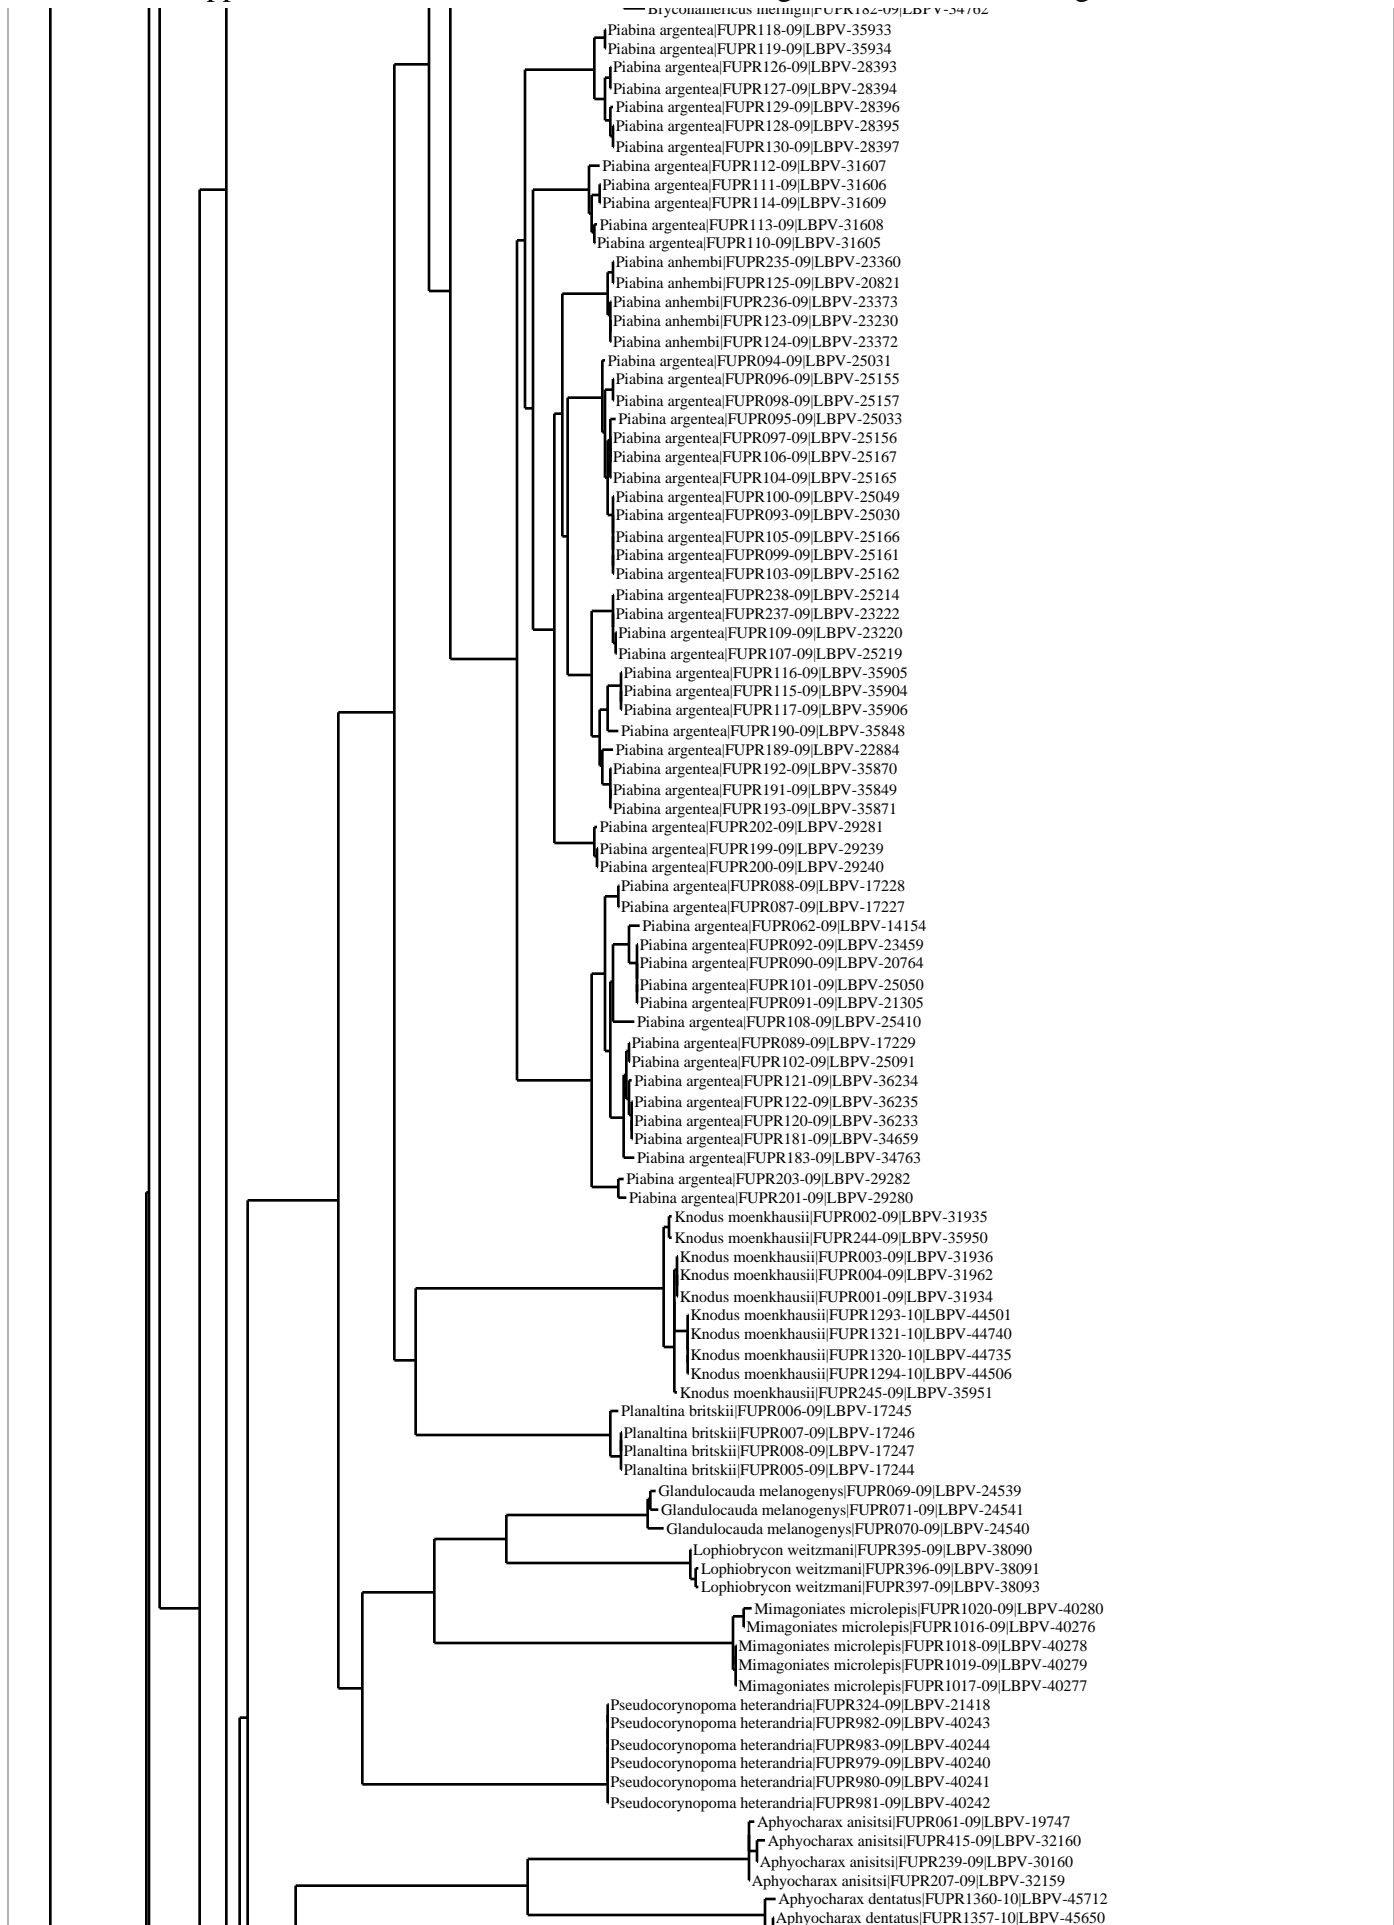

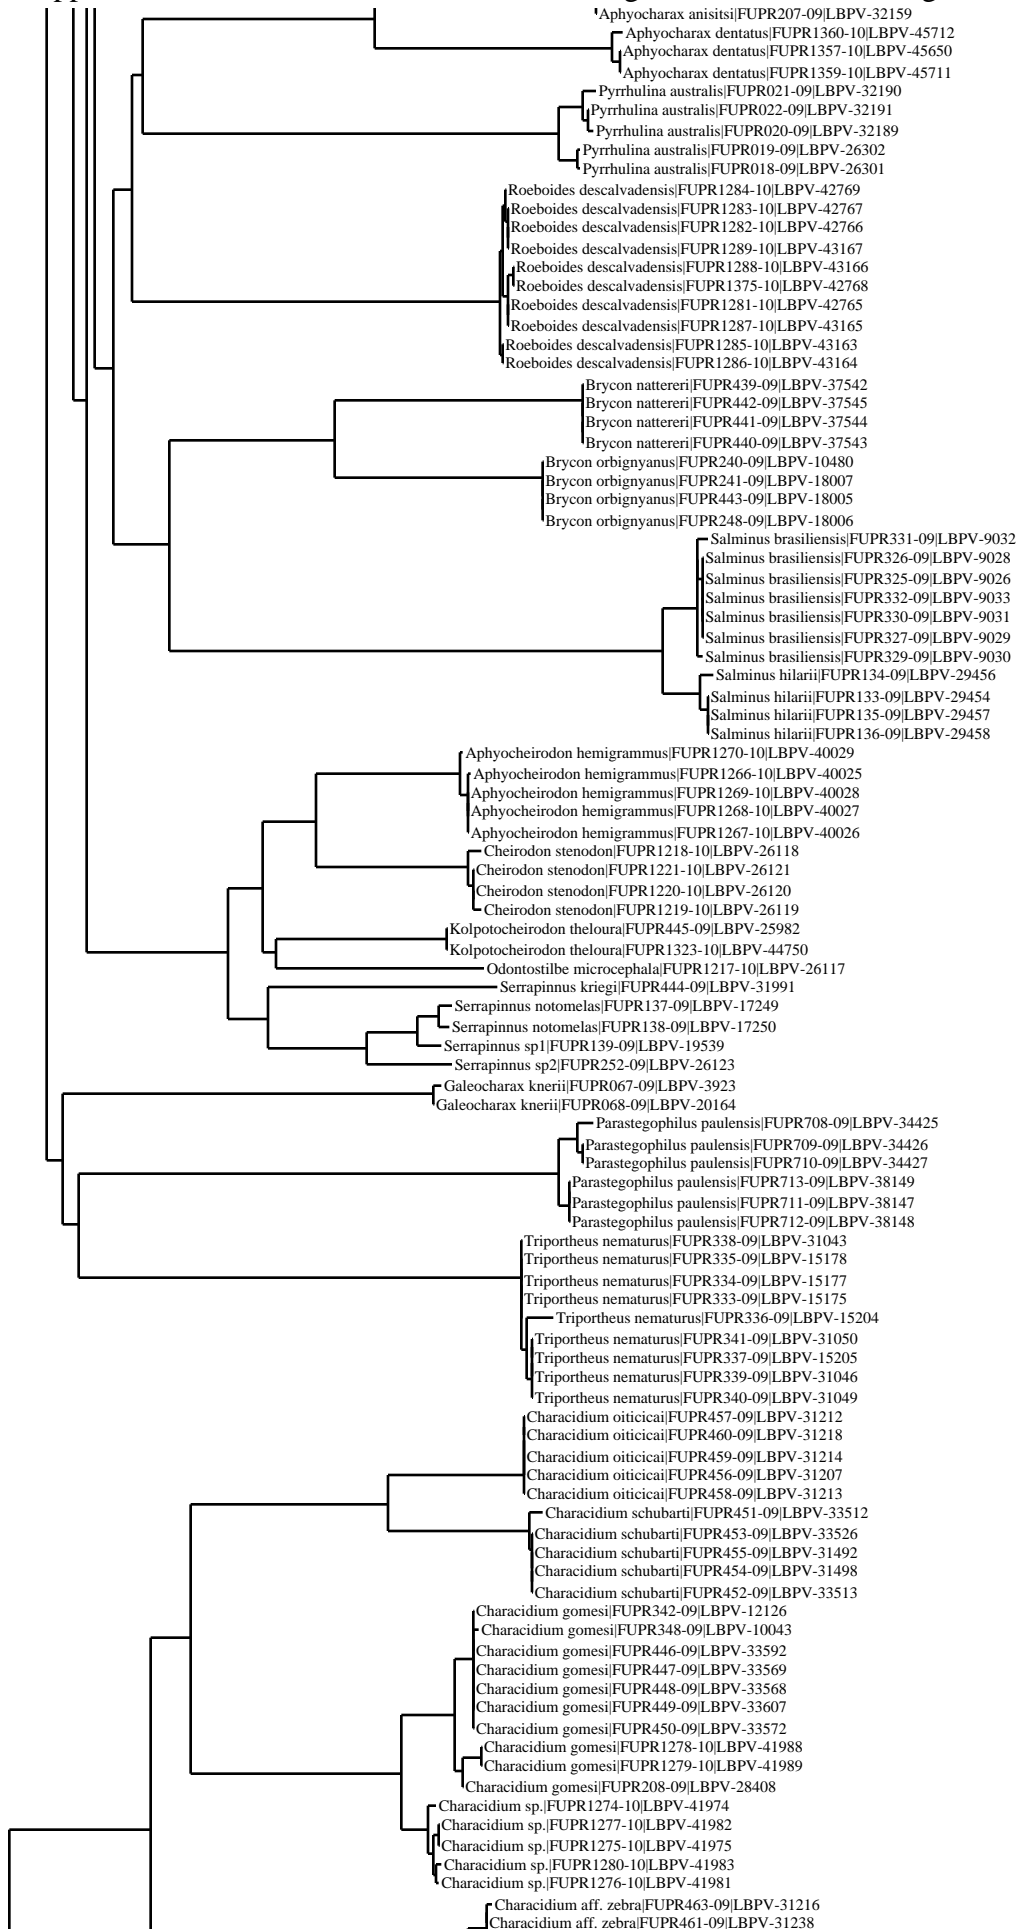



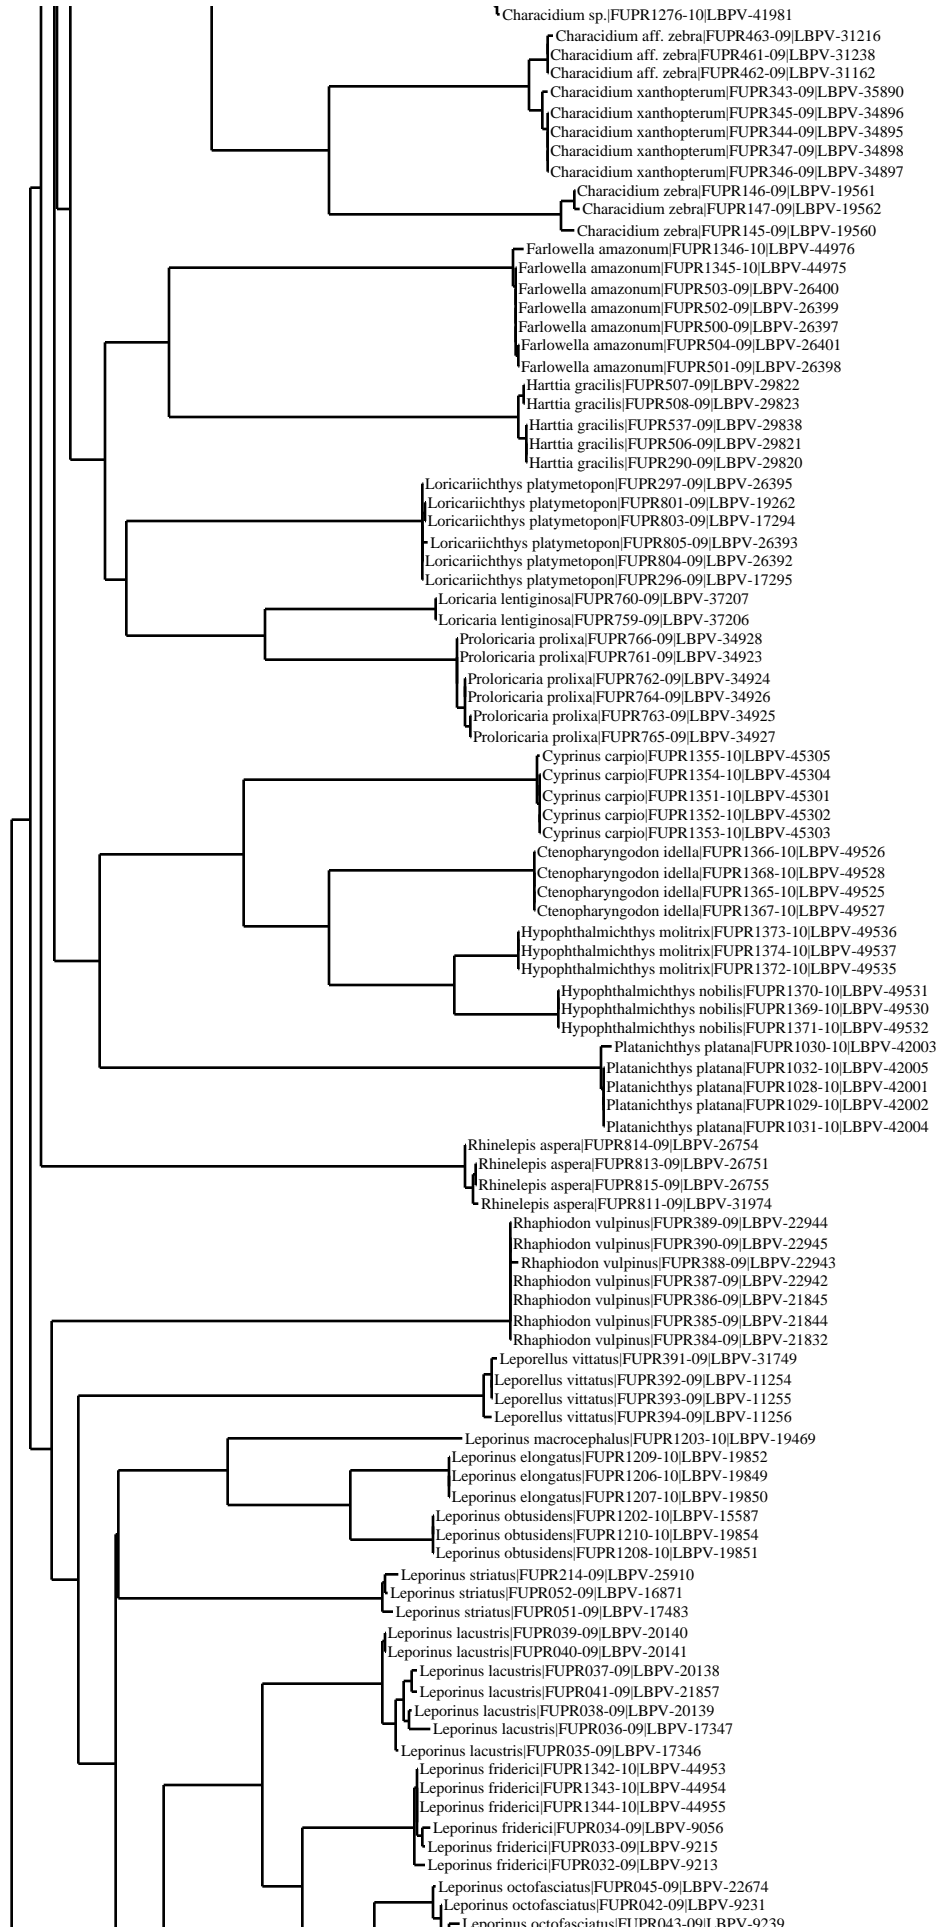

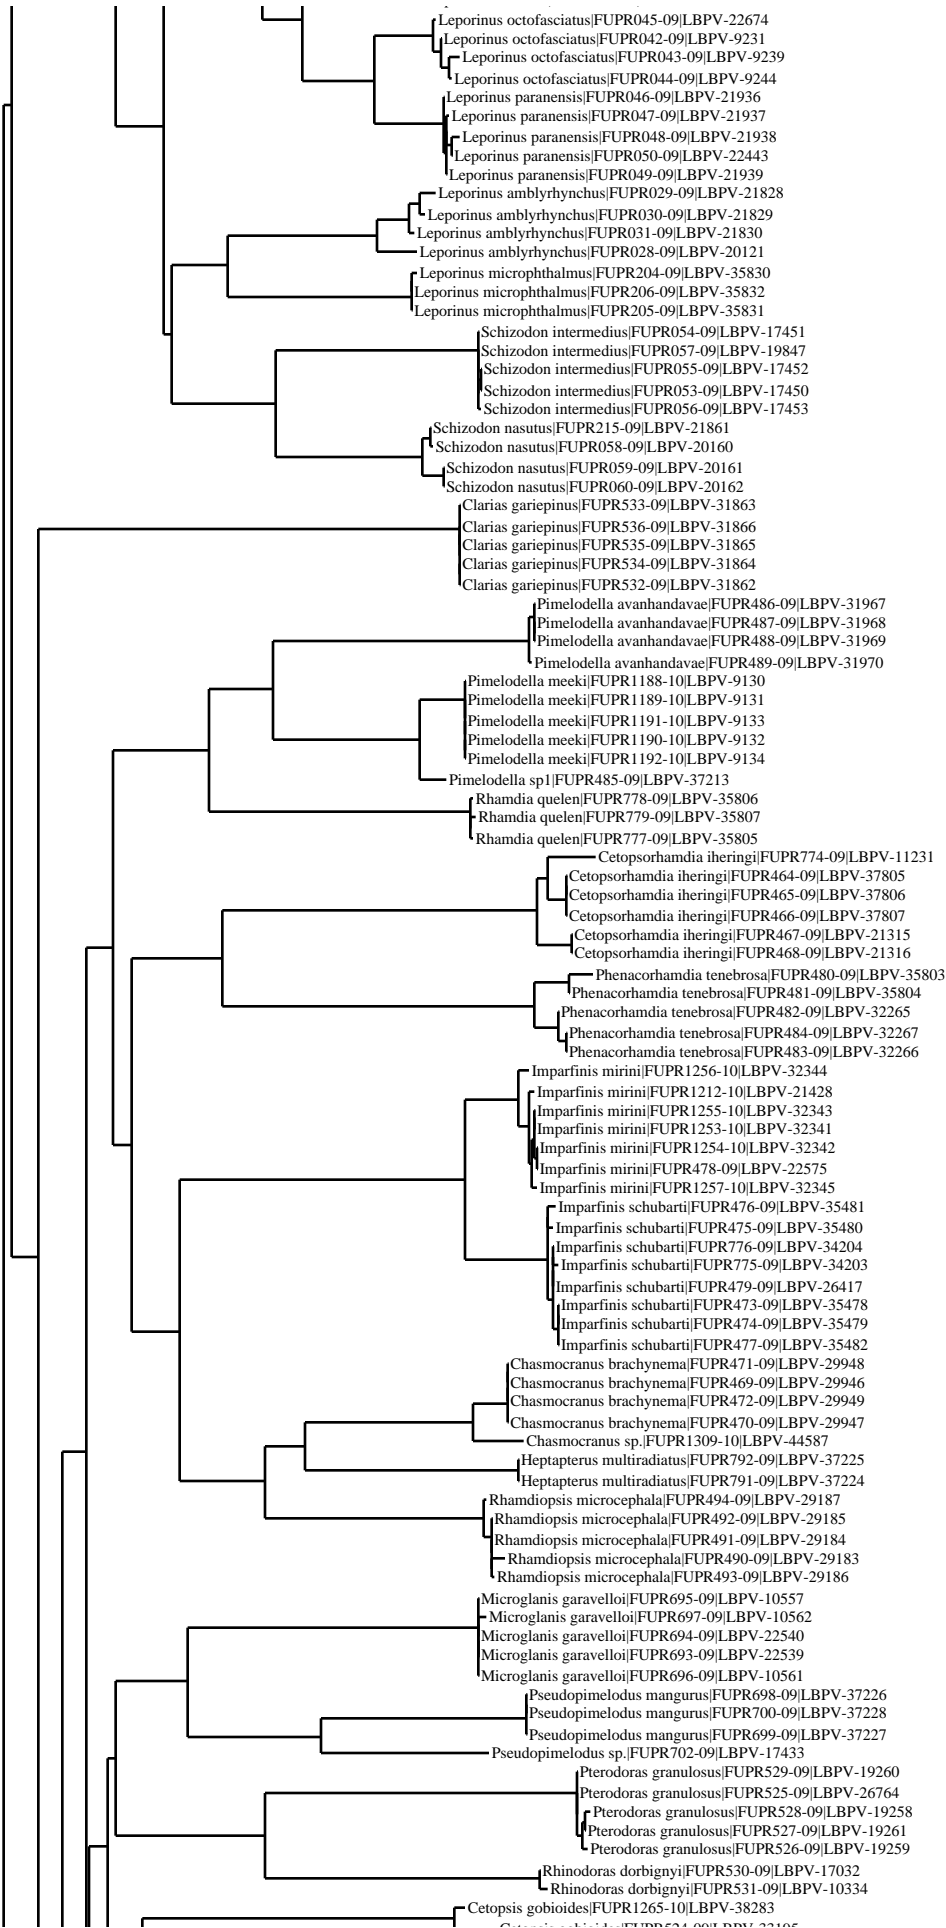

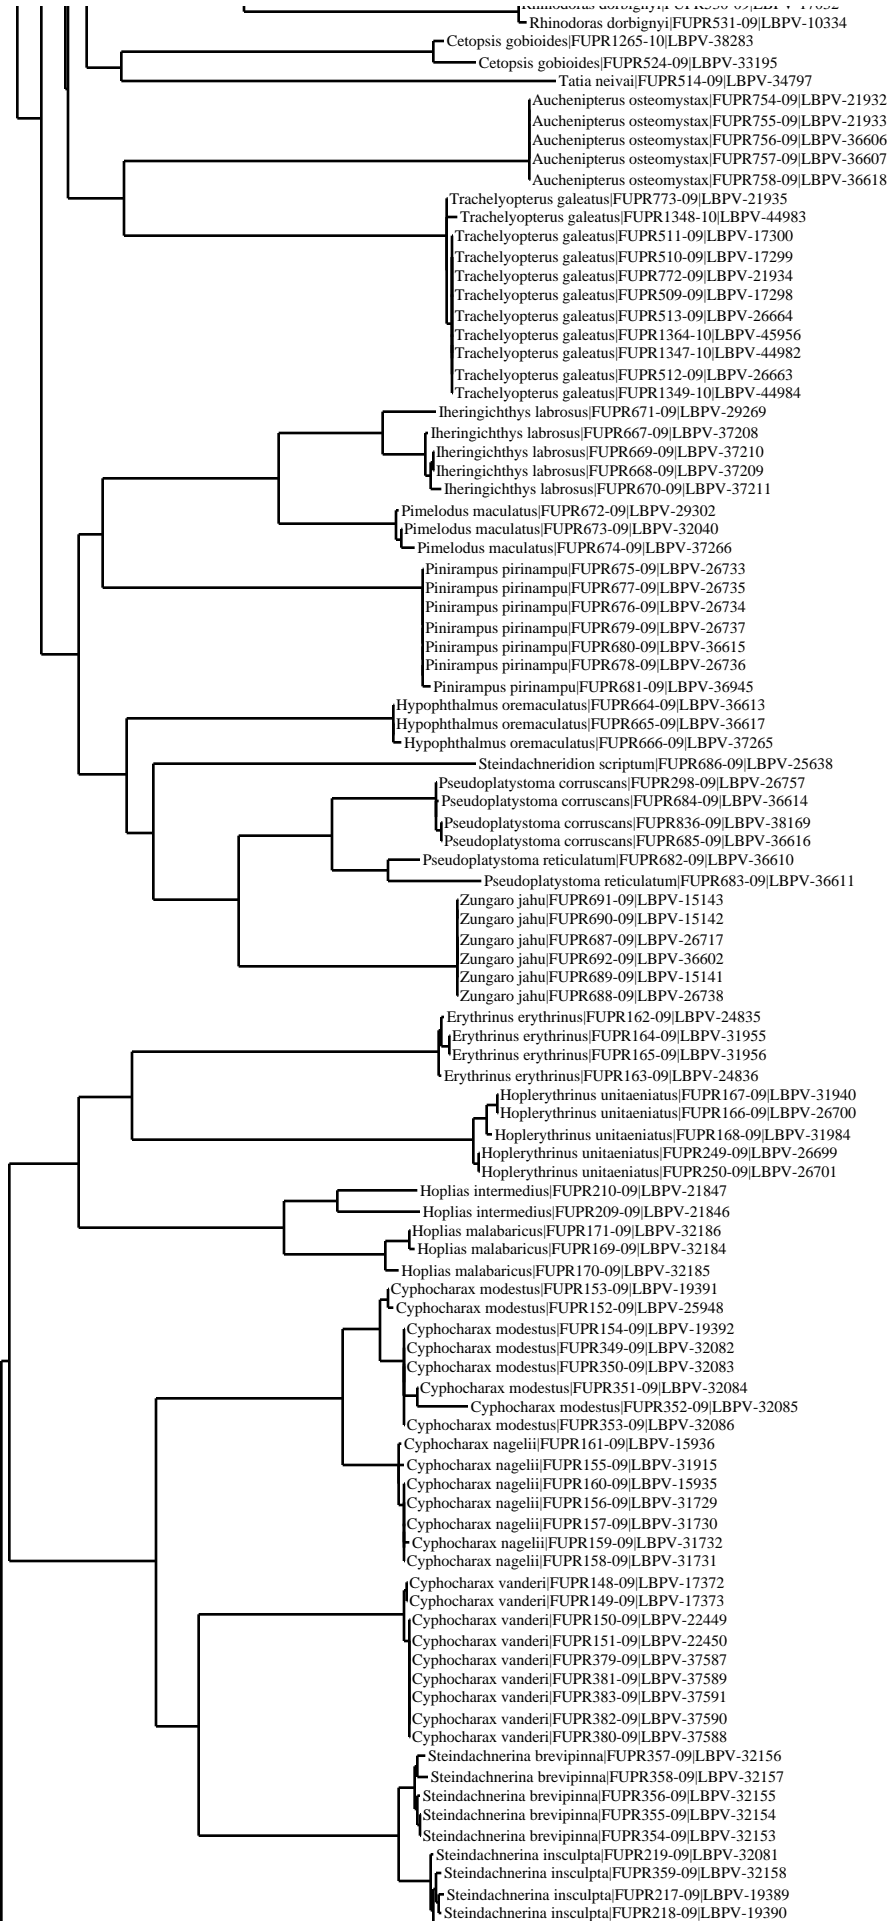

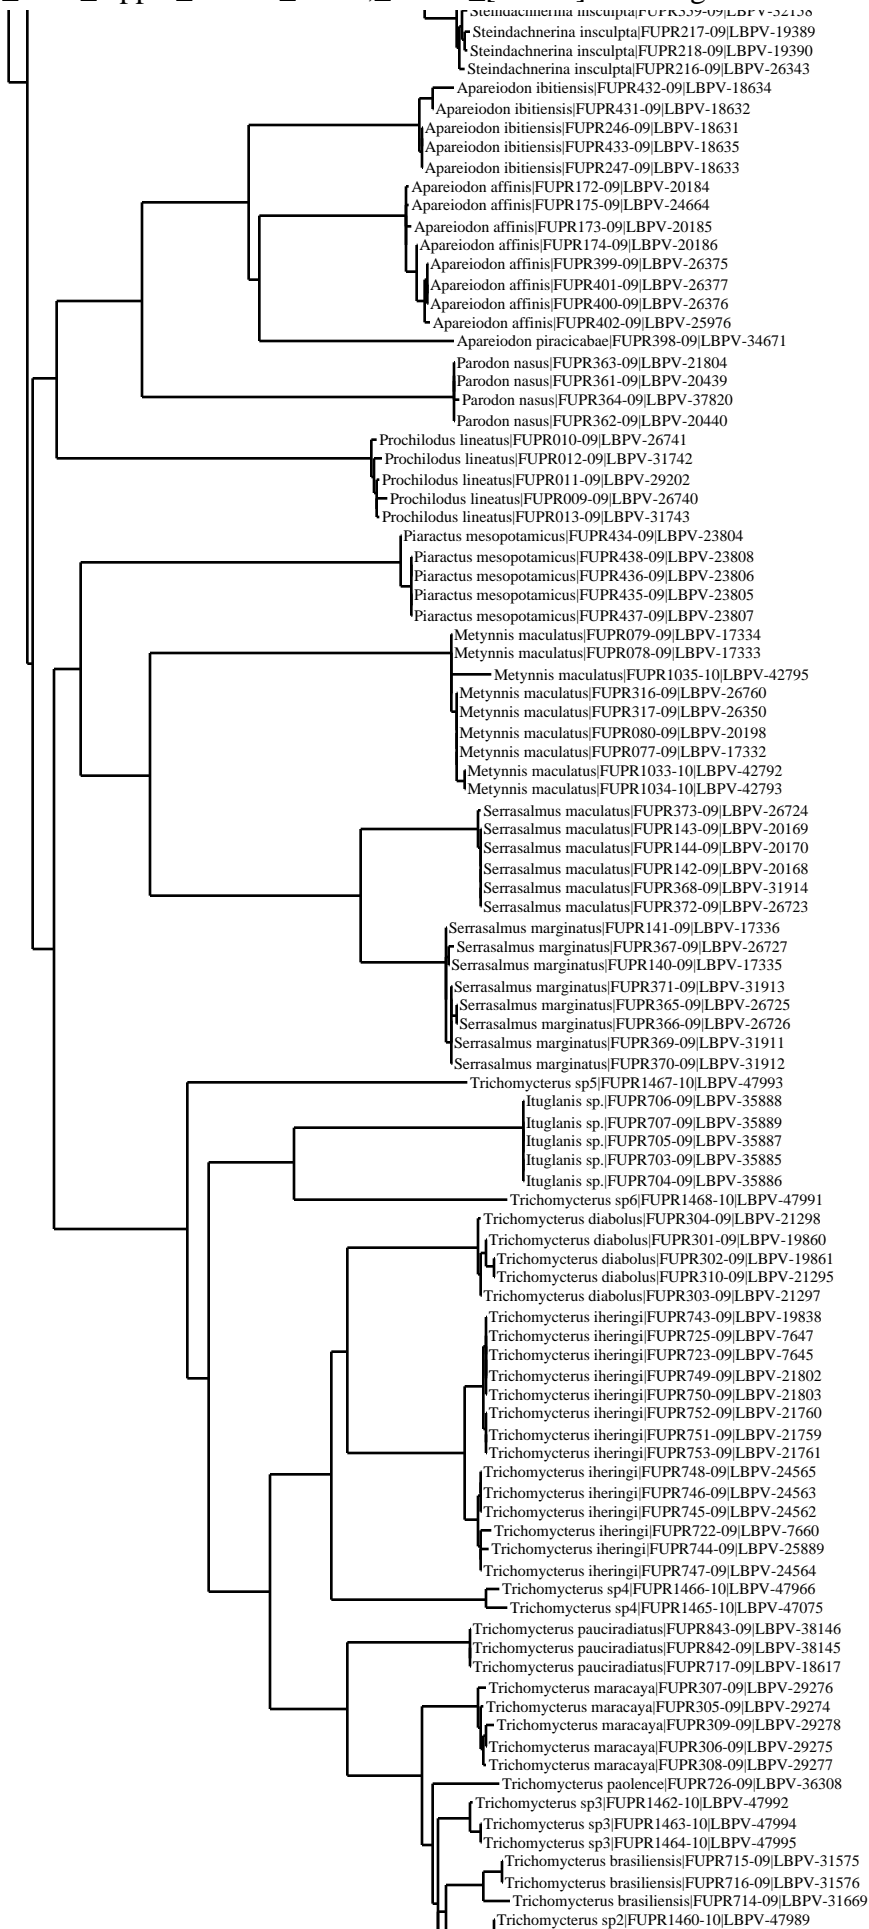

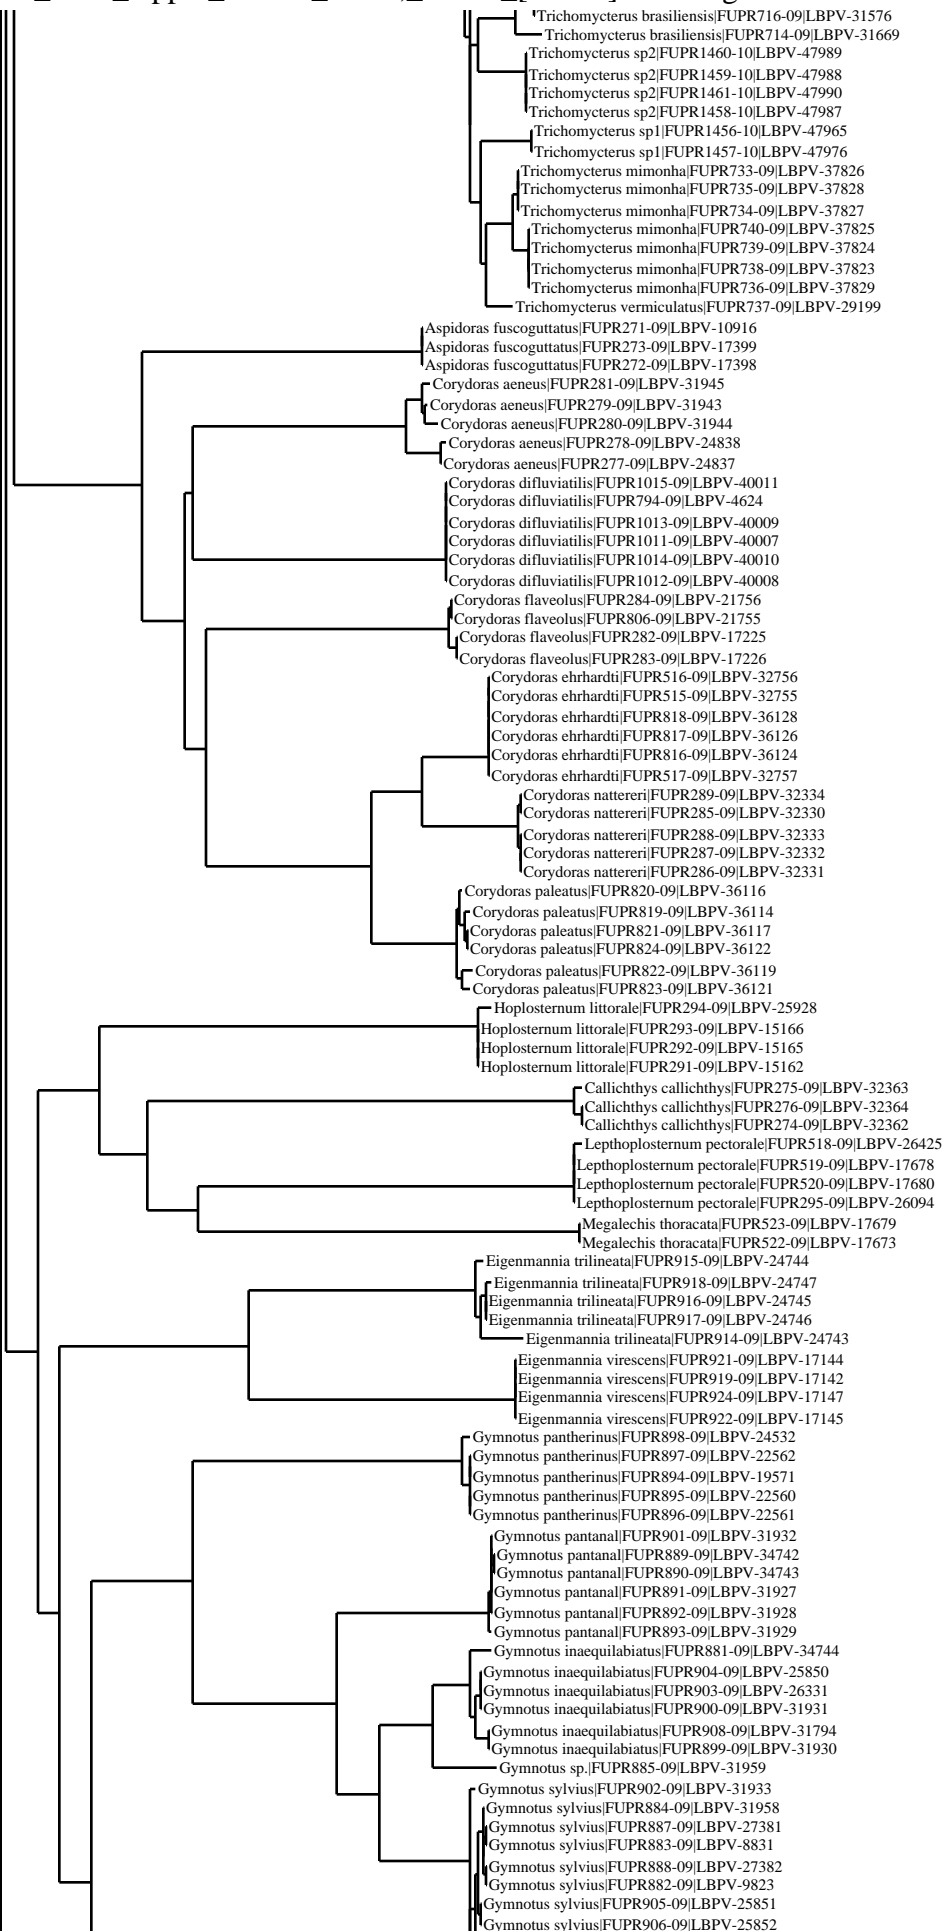

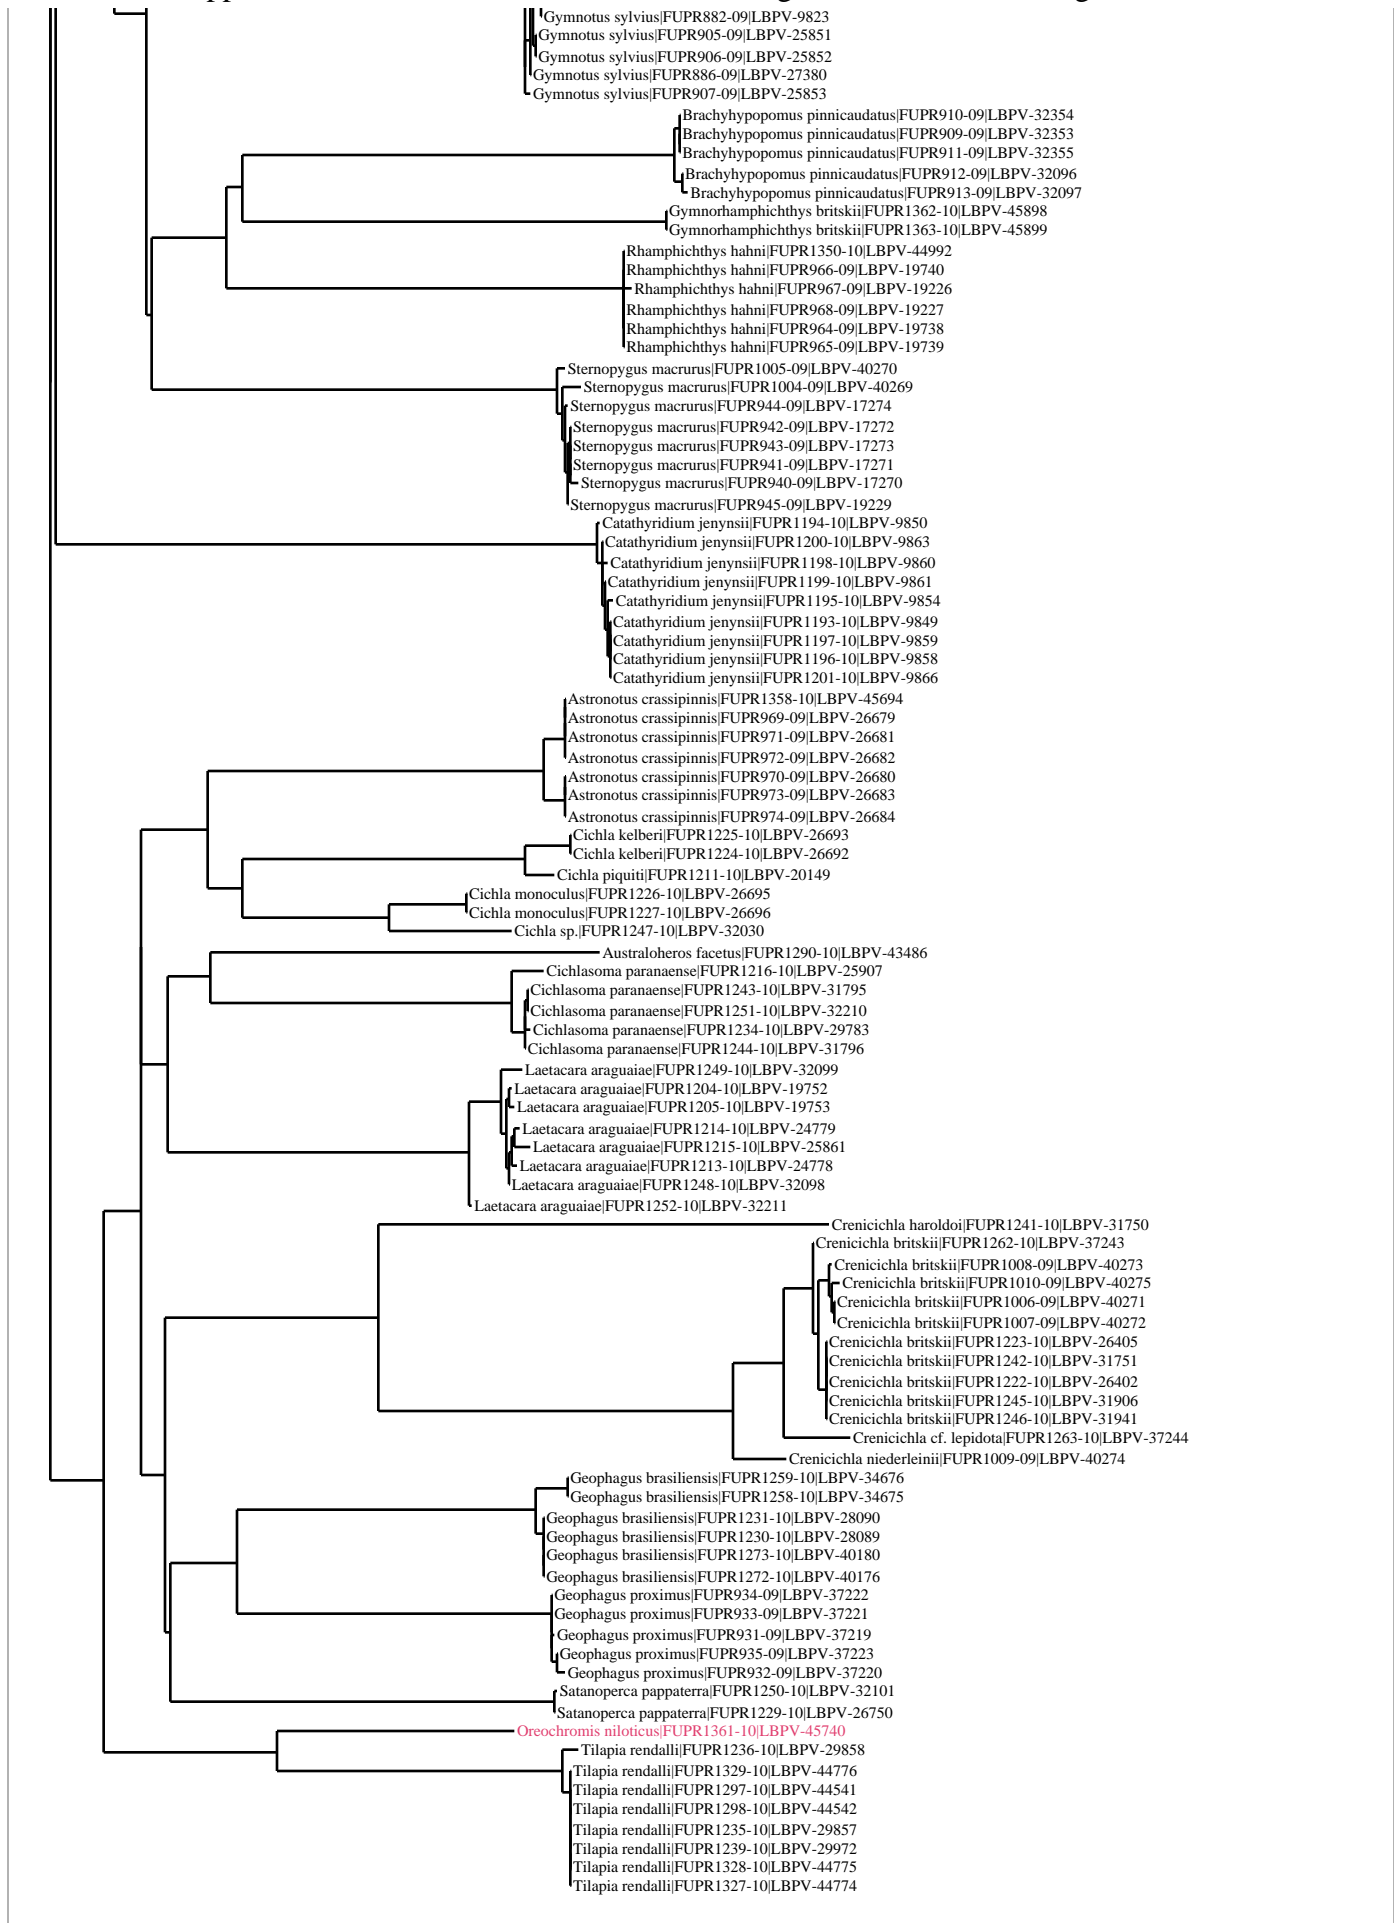

Supplement: 1471-2156-14-20-S2.pdf [file 1471-2156-14-20-S2.pdf]
